# Supplementary material for: Precise genome engineering in Pseudomonas using phage-encoded homologous recombination and the Cascade–Cas3 system
Source: Springer Nature journal article supplement (doi:10.1038/s41596-023-00856-1), 2023-08-25
Supplement: MOESM2 [file 41596_2023_856_MOESM2_ESM13.xlsx]

## Sheet: Supplementary Figure 1
P. putida KT2440
	TEPsy	TEPsyS	pluγTEPsy	pluγTEPsyS	BAS
	176	209	88	106	417
	197	228	78	132	503
	166	254	73	117	548
Average	180	230	80	118	489
P. syringae DC3000
	TEPsy	TEPsyS	pluγTEPsy	pluγTEPsyS	redγTEPsy	redγTEPsyS	BAS
	718	899	864	917	287	338	1077
	783	807	858	976	251	285	1165
	757	795	914	925	207	277	943
Average	753	834	879	939	248	300	1062
P. protegens pf5
	TEPsy	TEPsyS	pluγTEPsy	pluγTEPsyS	redγTEPsy	redγTEPsyS
	188	201	339	403	550	509
	169	227	287	442	402	581
	145	219	310	395	488	561
Average	167	216	312	413	480	550
P. aeruginosa PAO1
	TEPsy	TEPsyS	pluγTEPsy	pluγTEPsyS	redγTEPsy	redγTEPsyS	BAS
	40	35	38	46	51	71	438
	36	37	59	60	41	69	472
	46	34	64	50	31	57	431
Average	41	35	54	52	41	66	447

## Sheet: Supplementary Figure 2
Strains	Linear DNA without crRNA				Linear DNA with crRNA
				Average				Average
PAO1	210	239	265	238	959	805	986	917
Pf5	99	110	113	107	682	555	512	583
KT2440	45	43	51	46	316	259	274	283
DC3000	140	167	164	157	796	882	827	835

## Sheet: Supplementary Figure 5
P. aeruginosa PAO1
Time	Transformants				OD600
				Average				Average
1 h	1443	1222	1039	1235	0.22	0.25	0.23	0.23
1.5 h	7690	8849	8620	8386	0.34	0.26	0.28	0.29
2 h	14390	16420	11440	14083	0.37	0.36	0.33	0.35
2.5 h	24000	18760	19430	20730	0.65	0.67	0.71	0.68
3 h	12430	13190	10380	12000	0.84	0.83	0.94	0.87
3.5 h	9480	9940	8270	9230	1.14	1.03	1.13	1.1
P. protegens pf5
Time	Transformants				OD600
				Average				Average
1 h	1440	1876	1430	1582	0.22	0.25	0.28	0.25
1.5 h	4650	4450	4370	3177	0.43	0.45	0.42	0.43
2 h	17660	16480	17950	17363	0.66	0.68	0.74	0.69
2.5 h	8580	7550	8250	8127	0.94	0.92	1.14	1
3 h	3430	3750	3820	3667	1.25	1.22	1.37	1.28
3.5 h	2650	2944	2810	2801	1.35	1.43	1.45	1.41
P. putida KT2440
Time	Transformants				OD600
				Average				Average
1 h	6480	3580	3760	4607	0.33	0.26	0.28	0.29
1.5 h	9440	8490	9730	9220	0.54	0.56	0.51	0.54
2 h	24390	25330	20800	23507	0.64	0.63	0.66	0.64
2.5 h	36390	37990	39450	37943	0.82	0.76	0.73	0.77
3 h	15440	16280	14680	15467	1.14	1.04	1.16	1.11
3.5 h	10940	11440	12650	11677	1.44	1.48	1.41	1.44
P. syringae DC3000
Time	Transformants				OD600
				Average				Average
2 h	2780	2230	2910	2640	0.22	0.26	0.31	0.26
2.5 h	8890	8290	8480	8553	0.42	0.35	0.36	0.38
3 h	21090	17680	15770	18180	0.55	0.53	0.44	0.51
3.5 h	28780	26770	29130	28227	0.76	0.66	0.68	0.7
4 h	33550	37590	37220	36120	0.84	0.77	0.8	0.8
4.5 h	24330	20880	18340	21183	1.09	1.13	1.16	1.13
